# Supplementary material
Source: PubMed Central journal article supplement (PMC5388591)
Supplement: NIHMS838121-supplement-Supp_FigS1-S4-TableS1-3.pdf [file NIHMS838121-supplement-Supp_FigS1-S4-TableS1-3.pdf]

***New Phytologist* Supporting Information Figs S1–S4 and Table S1**

Article title: The phycocyanobilin chromophore of streptophyte algal phytochromes is synthesized by HY2

Authors: Nathan C. Rockwell, Shelley S. Martin, Fay-Wei Li, Sarah Mathews, and J. Clark Lagarias

Article acceptance date: 4 December 2016

The following Supporting Information is available for this article:

**Fig. S1** Gene models for Notes S1.

**Fig. S2** Synthetic gene sequence for the catalytic core of KflaHY2.

**Fig. S3** Synthetic gene sequence for the catalytic core of KflaHY1.

**Fig. S4** Synthetic gene sequence for the photosensory core module of MvirPHY1.

**Table S1** Accession information for FDBR and RCCR sequences

**Notes S1** Flat text alignment of FDBR sequences.

**Notes S2** Formatted input file for FDBR phylogeny.

Notes S1 and S2 are supplied in a single compressed archive (MD5 checksum 9bb79dbcd9e86431f1d13e56752a40f0).

**(a)**

CCMP329\_PcyA

underline = EST EC654063 (Genbank)

cyan highlights = genomic Contig25718 (Cyanophora genome home page)

LIKRLADTIEEVWENKLDLTPYELPEDLGIVEGRLEGERLVIENKCFOSTAFRKMHELELARVGNLNDILHC  
VMFPNKEYALPMFGADLVGGRGQLSACIVDLSPTSPNGLPAGYVERLEGLERPQFSQPRELPPWGHIFSPF  
CTFIRPAGENEEDQFLALVRSYMEIHCDMANIMPKLTAVDDINNNLRGQKSYCTSQQQNDKTRRVLEMAFG  
DAWAERYMTTVLFD

**(b)**

SL-175\_PubS

green highlights = large insertions (\*\*\*) in Supp. Note 1)

VWHAHMSWLFARLEDALGPLTAVNIPDDLAVQTRPNKAHAQTWVFSSPHARRIRFTYVDAGVNAQIFNCVV  
YPRC **DAEENDAQGTTAATSPSKGTATNESNGITSTVAAAT**CLGDAPLLGVDLLCLAGGRKILVGIDLQPLS  
RGDAYLARYAPALAAATREERFPDLNLVQPSKKFYEDAQYFSPAMLFARPEAAEMARA **AAAAAAAAAGADFP**  
**VCLDTCADHD**CGVELLQARVLDVAVKVYTEEFLRVLDV **EEDASAGRGEARARGGGFGNNVINSIMASVGVG**  
**VAMKRGTDEAGEVAAAETAAREGADTEVSHVPQLEPQLEPQLEKPEPESPTLVAWDDGEAAVEAVAAGE**  
**MENTTARAVARAAVEEATGARGKGGSRSSPQDAAVVVAAAASDAAEQQPQAEAESPTLVSWDDGEAAVE**  
**AVSAGEMENTTAHAAAARAAVEEAAGVRGKRSPRARILSPMATAAAQDSHDDWQRARDPAVPMFASYFGKEW**  
ANRMAHEVLFP

**Fig. S1** Gene models for Notes S1. (a) For *Cyanophora paradoxa* CCMP 329, neither the draft genome (cyan) nor the available expressed sequence tag (EST) data (underline) contained a complete PCYA gene model. However, the available sequences overlapped each other, permitting inference of a complete sequence for the catalytic core region used in our phylogenetic analysis. (b) For *Mantoniella antarctica* SL-175, the PUBS sequence contained large insertions (green) that were replaced with asterisks in the structurally corrected alignment (Notes S1) and with gap characters in the input file for phylogenetic analysis (Notes S2).

```
ATGGAAGAAGCAAGTGC GGGTGAATCGGGCAGCAATGATGGTCTGTACAAACCGTTTCGTTGAATACGCCGTGAAGGCTCTGG
M E E A S A G E S G S N D G L Y K P F V E Y A V K A L
GTGAAAAAATGGAAGTGTGGCCGTATCCGATTAAGAAGAATTTATCCGCCTGGAAGCGACCGATTCCAAGGGTCAGAAGGCCGT
G E K M E L W P Y P I K E E F I R L E A T D S K G Q K A V
GACCGACAGTACGTACCTGCAGTCCATAAACTGCGTCAAATGCGCGCGTGCAACATTGAGCCGGCAACAATCTGCAAGTTCTG
T D S T Y L Q S H K L R Q M R A C N I Q A G N N L Q V L
AATCTGATCGCGTTTCCGCGCCCGAATATGATCTGCCGTAATTCTGTGCAGACCTGGTACCCTGCCGCGTGGTCATCTGCAAA
N L I A F P R P E Y D L P Y F C A D L V T L P R G H L Q
TTCTGGATCTGAACCCGCTGCACAAAACCCCGGAACATTTTAAAAACACATCAAGCCGCTGCTGCCGATTACCAATCGCTATAT
I L D L N P L H K T P E H F E K H I K P L L P I T N R Y I
CAAAGTCTGCCGTGGGGCGGTGAATTCACGGCAGAATCACTGCAGTTTTTCTCGCCGGCTCTGCTGTGGACCCGTCAGAGCAT
K V L P W G G E F T A E S L Q F F S P A L L W T R P S D
CGTACCACGGTCCAAACGGTATCTTGAAGCCTTCAAGGAATACATCGATGCGTACGCCGAAATGGTTGCAAAGGCTGTCCGA
R T T V Q T V I F E A F K E Y I D A Y A E M V A K A V P
CCACGGACCCGGTCAAATTCACGTAACCCGGAAGCTCAGCATAAATATGTGTGCTGGCGTGCAGAAAAAGATCCGGGTCGTCC
T T D P V E I A R N R E A Q H K Y V C W R A E K D P G R P
GACCATTACGCGCTGTATGGCACC GAACTGTGTGAAGCGTACATCCACGGCTTTCTGTTGACGGTATGAAAGA ACTGGGCAGC
T I T R L Y G T E L C E A Y I H G F L F D G M K E L G S
AAGTCTTTTCTGGATTATTTCCCGAATACCGTGGCCCGGACGGTAACGTGATTA AAAAGCGCTCTGTGGTTGGTAAAAAGTGGC
K S F L D Y F P E Y R G P D G N V I K K R S V V G K K C
TTACCCGTCGTTGGGATCTGGACGGCAATTTTATCCCGCCGACGTAA
V T R P W D L D G N F I P P T
```

**Fig. S2** Synthetic gene sequence for the catalytic core of KflaHY2. The synthetic gene (Genscript) and coding sequence are shown.

CATATGGAGGAGAAGAAAGGTCGTCGTCGTCGCGGGCGAAGCGAAAGGTTTTGTGGAAGAGATGCGTATCAAGGCG  
GTATACCTCCTCTTTCCAGCAGCAGCAGGCCCGCTTCGCTTTCCAAAACACCTTCTCTACGCATAGTTCCGC  
M E E K K G R R R P G E A K G F V E E M R I K A

ATGAAGCTGCACACCCGCGTCAAGCGAAAGCGGCGAGGCGCAAGAGAAAGAAACCCAGCAAAAACCGCTGCCG  
TACTTCGACGTGTGGGCGCCAGTCCGCTTTCTGCCGCTCCGCGTTCTTTTCTTTGGGTCGTTTTTGGCGACGGC  
M K L H T R G Q A K D G E A Q E K E T Q Q K P L P

CAGTGAAGCCGACCGTGGAGGGCTACATCCAATTCTGGTGGACAGCAAAGCGGTTTATGATACGATGGAGGGC  
GTCACCTTCGGCTGGCACCTCCCGATGTAGGTTAAGGACCACCTGTCGTTTCGCCAAATACTATGCTACCTCCGC  
Q W K P T V E G Y I Q F L V D S K A V Y D T M E A

ATTGTTGACAAAGCGCCGACCCAGAGCTACGCGGAGTTCGGTAACACCGGTCTGGAACGTACCGGCCCGCTGAGC  
TAACAAGTGTTCGCGGCGTGGTCTCGATGCGCCTCAAGGCATTGTGGCCAGACCTTGCATGGCCGGGCGACTCG  
I V D K A P H Q S Y A E F R N T G L E R T G P L S

AAAGATCTGGAGCACTTTCTAGCGAAGGTTATAGCATCCCGGAGCCGACCGAAGCGGGTCTGACCTATAGCAAG  
TTTCTAGACCTCGTGAAGCATCGCTTCCAATATCGTAGGGCCTCGGCTGGCTTCGCCCAGACTGGATATCGTTC  
K D L E H F R S E G Y S I P E P T E A G L T Y S K

CTGCTGGAGGAACTGAGCGAGAGCAACCCGCAAGCGTTTCATTTGCCACTTTTACAACGTGTATTTTGGCGACAGC  
GACGACCTCCTTGACTCGCTCTCGTTGGGCGTTCGCAAGTAAACGGTGAAAATGTTGCACATAAAACGCGTGTCG  
L L E E L S E S N P Q A F I C H F Y N V Y F A H S

GCGGGTGGCCGTATGATCGGTCTGAAAGTTAGCGAGATGATTCTGGAAGCCGTGAGCTGGAATTTTATAAGTGG  
CGCCACCGGCATACTAGCCAGCATTTCAATCGCTCTACTAAGACCTTCGGCACTCGACCTTAAAATATTACC  
A G G R M I G R K V S E M I L E G R E L E F Y K W

GACGGCGAGCTGAGCGAACTGCTGGATAAGGTGAAACTGAAGATCAACGAAGTTAGCAACGACTGGACCCGTGAG  
CTGCCGCTCGACTCGCTTGACGACCTATCCACTTTGACTTCTAGTTGCTTCAATCGTTGCTGACTGGGCACTC  
D G E L S E L L D K V K L K I N E V S N D W T R E

GAAAAGATAAGTGCCTGCAAGAGACCGAACTGAGCTTCAAGTATAGCGGTAGCCTGCTGAAACTGCTGGCGAAC  
CTTTTCCTATTACGGACGTTCTCTGGCTTGACTCGAAGTTCATATCGCCATCGGACGACTTTGACGACCGCTTG  
E K D K C L Q E T E L S F K Y S G S L L K L L A N

ACCATTTACCTAGCGTGACAACCTTATCCTCGAG  
TGGTAAATGGATCGCACTGTTGAATAGGAGCTC  
T I Y L A

**Fig. S3** Synthetic gene sequence for the catalytic core of KflaHY1. The synthetic gene (Genscript) is shown with the open reading frame in green and with flanking sequences in red.

ATGGGTACGCTGTCAGGCTCGCAGGCAAACAGTGTGGAAGTTGCACGCGCTCAAGCGGATGCCGACGCAACCCTGAATGATGC  
 M G T L S G S Q A N S V E V A R A Q A D A D A T L N D A  
 GTATGAACAGGAAAAATCTCATGGCGTCCACTTTGATTACGGCCATAAAGTGTGGACGCTAACAGAGCGCGCGTATGTCTG  
 Y E Q E K S H G V H F D Y G H K V L D A N Q S A R M S  
 AAAGCTCTGGCGGTGGCACGAGCTTCGGTGCTATGGCGTATGCAACCGTATGCAGCGTCCGGGTATTATCCAATCATACGGC  
 E S S G G G T S F G A M A Y A T R M Q R P G I I Q S Y G  
 TGCTGTCTGGTGGTTGATGCGGTGTTTAAAATTATCGCGGCTCGGAAAACGCACTGGCTATGCTGACCGGTAAAACGGTTCA  
 C C L V V D A V F K I I A A S E N A L A M L T G K T V Q  
 GGATAAACATGCCATTATCGGCCAAGACAGCCTGTCTCTGTTTTCCGTGGCAGCTGCGGCCACCTGAAGAAAACGGCGTAGTT  
 D K H A I I G Q D S L S L F S V A A A A H L K K A A S  
 CCAAAGATCTGGGTGTCGTGAATCCGGTTGCTGTGTTTCCGCGGGTACCGGTAACCGTTTTTTCGCGATTATGCATCGCAAC  
 S K D L G V V N P V A V F A A G T G K P F F A I M H R N  
 GATGTTGGCCTGGTCATTGACCTGGAACCGATTACCCGCGAGGCAAATACCGGTCCGGCCCAAGCGGTGCACTGGCTTCTCA  
 D V G L V I D L E P I H P Q A N T G P A Q A G A L A S H  
 TAAACTGGCCAGTGATTCCGTGGCAAACTGCAGTGC GTTGGTCCGGCAACCTGGACCAAGTGTATAAAATTCTGGTGAAG  
 K L A S D S V A K L Q C V G P G N L D Q V Y K I L V E  
 AAGTTCGCTACTGACCGTTATGATCGTGTATGGTCTACAAATTTTCATCCGGACATGCACGGCGAAGTTGTCGCTGAATCG  
 E V R S L T G Y D R V M V Y K F H P D M H G E V V A E S  
 GTTGATGCGGGTGTGCAACAGTTTTCTGGGCTGCATTATCCGGTACCGACATTCCGCGAGCAGCTCGTGCCTGTTCTGTCG  
 V D A G V E Q F L G L H Y P A T D I P Q A A R A L F V R  
 TAATCGCGTTCGATGATCGCGGATGTTACCACGAAAGCGTCCCGATGCTGCAGGATTCTTACCTGAAACACCCGGTTGACA  
 N R V R M I A D V T T E S V P M L Q D S Y L K H P V D  
 TGTCATTCTCGACCCTGCGCGGTGTGCTGCATTGTACCGTGAATATATGGCGAACATGGGCAGCCTGGCCTCTCTGGTTATG  
 M S F S T L R G V L H C H R E Y M A N M G S L A S L V M  
 GCAGTGGTTGTCAATGAATACGATGAAAGTGCATCGTCCCCTGCCCCGATTGGTACGCGTCTGTGGGGCTGGTGGTTTG  
 A V V V N E Y D E S D R T S R R P I G Q R L W G L V V C  
 CCATCACATTACCCCGCGCTGTGCTGTATCCGCTGCGTAGTGCCTGTTCTTTCTGGTGCAGTTTTTACGCTGCAAAATTA  
 H H I T P R V V L Y P L R S A C S F L V Q V F S L Q I  
 ACGCAGAAATGGAACGACGTTTTAGCAACGTGAAAAAGAAGTGATTCGCACCCAGGCCATCCTGTGCGATATGCTGCAACGT  
 N A E M E R T F Q Q R E K E V I R T Q A I L C D M L Q R  
 GACGACCCGATTGGTATCGTTACCCAGACGCCAATATCATGGATCTGGTGCCTGTGATGGTGCGGGTCTGTGGTATGGTGG  
 D A P I G I V T Q T P N I M D L V P C D G A G L W Y G G  
 CCGTCTGCTGACTGGGCGTTACCCCGTCCGAAGATGCAGTCAACAGCTGGTGAATGGATGCTGATGCATCACGGTGATA  
 R F W S L G V T P S E D A V E Q L V K W M L M H H G D  
 GCACCGGCTGTCAACGGACAGCCTGACCGAAGCGGGTTATCCGGGCGCCGAAGCGCTGGCATCTACCGTGTGTGGTCTGGCC  
 S T G L S T D S L T E A G Y P G A E A L A S T V C G L A  
 GCATGTCGATTACCGAAAACGATTTTTCTGATGTGGTCCGCGGTCCGACCAACCGTACGATCAATTGGGCGGGCCAGACCCA  
 A C R I T E N D F L M W F R G P T N R T I N W A G Q T H  
 TGATCCGAATGCAGCTGATGACCAGAAGAAAATGCACCCGCGCTAGTTTTGCGGCCTTCAGGAAGTTGTCCTGGTCAAT  
 D P N A A D D Q K K M H P R A S F A A F Q E V V R G Q  
 CCGCCCCGTGGGAAGATGGCGAATGGACATTATCCATTCTGCGAGCTGATTCTGCGCGGTCAATTTGCAGATATCGAAGAC  
 S A P W E D G E M D I I H S L Q L I L R G Q F A D I E D  
 GTCGCGTGCCTACGATGATTCACTGCGCCTGAATCAGTGCCTGATAAAACATCGATGAAGTCAATACCGTGGCGAGTCC  
 V G V R T M I H L R L N Q L R L K N I D E V N T V A S P  
 CGGG  
 G

**Fig. S4** Synthetic gene sequence for the photosensory core module of MvirPHY1. The synthetic gene (Genscript) and coding sequence are shown.

**Table S1** Accession information for FDBR and RCCR sequences<sup>1</sup>

| Protein         | Organism                                            | Database | Accession           |
|-----------------|-----------------------------------------------------|----------|---------------------|
| PcyAANASP       | <i>Nostoc</i> sp.<br>PCC 7120                       | DOE-IMG  | alr3707             |
| PcyANOSPU       | <i>Nostoc punctiforme</i><br>PCC 73102              | DOE-IMG  | Npun_R5577          |
| PcyATRICH       | <i>Trichodesmium</i><br><i>erythraeum</i> IMS101    | DOE-IMG  | Tery_4156           |
| PcyASYNP7       | <i>Synechococcus</i><br><i>elongatus</i> PCC 7942   | DOE-IMG  | Synpcc7942_1225     |
| PcyASYNY3       | <i>Synechocystis</i> sp.<br>PCC 6803                | PDB      | 2D1E                |
| PcyAFREDI       | <i>Tolypothrix</i><br>sp. PCC 7601                  | DOE-IMG  | fdiDRAFT29270       |
| HLUCCO16_03155  | <i>Phormidium</i><br>sp. OSCR                       | DOE-IMG  | HLUCCO16_03155      |
| Lepto7104D_5008 | <i>Nodosilinea</i><br><i>nodulosa</i> PCC 7104      | DOE-IMG  | Lepto7104DRAFT_5008 |
| PcyACROWA       | <i>Crocospaera</i><br><i>watsonii</i> WH 8501       | DOE-IMG  | CwatDRAFT_2748      |
| PcyASYNP2       | <i>Synechococcus</i><br>sp. PCC 7002                | DOE-IMG  | SYNPCC7002_A2228    |
| PcyAGLOVI       | <i>Gloeobacter</i><br><i>violaceus</i> PCC 7421     | DOE-IMG  | gvip359             |
| PcyASYNEL       | <i>Thermosynechococcus</i><br><i>elongatus</i> BP-1 | DOE-IMG  | tl12308             |
| PcyASYNPX       | <i>Prochlorococcus</i><br>sp. WH8102                | DOE-IMG  | SYNW1084            |
| PcyASYN9605     | <i>Prochlorococcus</i><br>sp. CC9605                | DOE-IMG  | Syncc9605_1216      |



|                |                                                       |                         |                |
|----------------|-------------------------------------------------------|-------------------------|----------------|
| PcyASYN9902    | <i>Prochlorococcus</i><br>sp. CC9902                  | DOE-IMG                 | Syncc9902_1253 |
| PcyAPROMA      | <i>Prochlorococcus</i><br><i>marinus</i> CCMP<br>1375 | DOE-IMG                 | Pro0819        |
| PcyAPROMM      | <i>Prochlorococcus</i><br><i>marinus</i> MIT 9313     | DOE-IMG                 | PMT0590        |
| SynRCC307_1284 | <i>Synechococcus</i> sp.<br>RCC307                    | DOE-IMG                 | SynRCC307_1284 |
| CYME_CMG110C   | <i>Cyanidioschyzon</i><br><i>merolae</i> 10D          | Genbank<br>(genomic)    | CYME_CMG110C   |
| SAG4_97_PCYA   | <i>Cyanoptyche</i><br><i>gloeocystis</i>              | MMETSP1086              | 36603_1        |
| SAG46_84_PCYA  | <i>Gloeochaete</i><br><i>wittrockiana</i>             | MMETSP<br>transcriptome | 177546_1       |
| CCMP329_PCYA   | <i>Cyanophora</i><br><i>paradoxa</i>                  | multiple<br>sources     | See Fig. S1    |
| CCMP717_PCYA   | <i>Nephroselmis</i><br><i>pyriformis</i>              | MMETSP0034              | 35417_1        |
| CCMP1998_PCYA  | <i>Pycnococcus</i> sp.                                | MMETSP1085              | 7414_1         |
| SL-175_PCYA    | <i>Mantoniella</i><br><i>antarctica</i>               | MMETSP1106              | 20204_1        |
| RCC2596_PCYA   | <i>Ostreococcus</i><br><i>mediterraneus</i>           | MMETSP0932              | 4952_1         |
| CCMP2329_PCYA  | <i>Picochlorum</i><br><i>oklahomensis</i>             | MMETSP1161              | 3223_1         |
| CCMP1320_PCYA  | <i>Dunaliella</i><br><i>tertiolecta</i>               | MMETSP<br>transcriptome | 38532_1        |
| CCMP219_PCYA   | <i>Chlamydomonas</i><br><i>euryale</i>                | MMETSP0063              | 48966_1        |

|              |                                          |                      |                  |
|--------------|------------------------------------------|----------------------|------------------|
| PCYACHLRE    | <i>Chlamydomonas reinhardtii</i>         | Genbank<br>(genomic) | XP_001693622     |
| PebAGLOVI    | <i>Gloeobacter violaceus</i> PCC 7421    | DOE-IMG              | gvip179          |
| PebAFREDI    | <i>Tolypothrix</i> sp. PCC 7601          | DOE-IMG              | fdiDRAFT24420    |
| PebA1CROWA   | <i>Crocospaera watsonii</i> WH 8501      | DOE-IMG              | CwatDRAFT_2853   |
| PebA2CROWA   | <i>Crocospaera watsonii</i> WH 8501      | DOE-IMG              | CwatDRAFT_0676   |
| PebANOSPU    | <i>Nostoc punctiforme</i> PCC 73102      | DOE-IMG              | Npun_R0730       |
| PebATRICH    | <i>Trichodesmium erythraeum</i> IMS101   | DOE-IMG              | Tery_5051        |
| PebAPROMA    | <i>Prochlorococcus marinus</i> CCMP 1375 | DOE-IMG              | Pro1749          |
| PebAPROMM    | <i>Prochlorococcus marinus</i> MIT 9313  | DOE-IMG              | PMT1686          |
| PebASYNPY    | <i>Synechococcus</i> sp. WH 8020         | DOE-IMG              | Ga0078671_111491 |
| PebASYNPX    | <i>Prochlorococcus</i> sp. WH8102        | DOE-IMG              | SYNW2020         |
| PebASYN9605  | <i>Prochlorococcus</i> sp. CC9605        | DOE-IMG              | Syncc9605_0423   |
| PebASYN9902  | <i>Prochlorococcus</i> sp. CC9902        | DOE-IMG              | Syncc9902_1906   |
| Gasu_55890   | <i>Galdieria sulphuraria</i>             | Genbank<br>(genomic) | Gasu_55890       |
| CCMP769_PEBA | <i>Rhodospirillum rubrum</i>             | MMETSP0011           | 7168_1           |



|                |                                          |                         |              |
|----------------|------------------------------------------|-------------------------|--------------|
|                | <i>marinus</i>                           |                         |              |
| CCMP1999_PEBA  | unclassified sp.                         | MMETSP1475              | 17257_1      |
| SAG1380-2_PEBA | <i>Porphyridium<br/>aerugineum</i>       | MMETSP0313              | 1488_1       |
| CCMP736_PEBA   | <i>Rhodella maculata</i>                 | MMETSP<br>transcriptome | 6728_1       |
| CCMP3124_PEBA  | <i>Erythrolobus<br/>australicus</i>      | MMETSP1353              | 532_1        |
| CCMP3234_PEBA  | <i>Madagascaria<br/>erythrocladiodes</i> | MMETSP1450              | 49920_1      |
| RCC2596_PUBS   | <i>Ostreococcus<br/>mediterraneus</i>    | MMETSP0932              | 4217_1       |
| BCC118000_PUBS | <i>Ostreococcus<br/>lucimarinus</i>      | MMETSP0939              | 5045_1       |
| CCMP1194_PUBS  | <i>Prasinococcus<br/>capsulatus</i>      | MMETSP0941              | 2435_1       |
| SL-175_PUBS    | <i>Mantoniella<br/>antarctica</i>        | MMETSP1106              | 8279_1       |
| Ppat_PUBS      | <i>Physcomitrella<br/>patens</i>         | Genbank<br>(genomic)    | AFK50337     |
| ZRMT-2001364   | <i>Mougeotia</i> sp.                     | OneKP                   | ZRMT-2001364 |
| STKJ-2007533   | <i>Cosmarium<br/>ochthodes</i>           | OneKP                   | STKJ-2007533 |
| Penium_PUBS    | <i>Penium<br/>margaritaceum</i>          | Genbank<br>(EST)        | HO601495     |
| kfl00619_0010  | <i>Klebsormidium<br/>flaccidum</i>       | Genbank<br>(genomic)    | GAQ90251     |
| Gasu_58250     | <i>Galdieria<br/>sulphuraria</i>         | Genbank<br>(genomic)    | Gasu_58250   |
| CCMP736_PEBB   | <i>Rhodella maculata</i>                 | MMETSP                  | 23469_1      |

|                |                                         | transcriptome |                  |
|----------------|-----------------------------------------|---------------|------------------|
| SAG1380-2_PEBB | <i>Porphyridium aerugineum</i>          | MMETSP0313    | 2204_1           |
| CCMP3124_PEBB  | <i>Erythrolobus australicus</i>         | MMETSP1353    | 9977_1           |
| CCMP769_PEBB   | <i>Rhodorus marinus</i>                 | MMETSP0011    | 7399_1           |
| CCMP3234_PEBB  | <i>Madagascaria erythrocladiodes</i>    | MMETSP1450    | 12871_1          |
| CCMP1999_PEBB  | unclassified sp.                        | MMETSP1475    | 3608_1           |
| PebBGLOVI      | <i>Gloeobacter violaceus</i> PCC 7421   | DOE-IMG       | gvip180          |
| PebBFREDI      | <i>Tolypothrix</i> sp. PCC 7601         | DOE-IMG       | fdiDRAFT24430    |
| PebBCROWA      | <i>Crocospaera watsonii</i> WH 8501     | DOE-IMG       | CwatDRAFT_5247   |
| PebBNOSPU      | <i>Nostoc punctiforme</i> PCC 73102     | DOE-IMG       | Npun_R0729       |
| PebBTRICH      | <i>Trichodesmium erythraeum</i> IMS101  | DOE-IMG       | Tery_5050        |
| PebBSYNPY      | <i>Synechococcus</i> sp. WH 8020        | DOE-IMG       | Ga0078671_111492 |
| PebBSYNPX      | <i>Prochlorococcus</i> sp. WH8102       | DOE-IMG       | SYNW2021         |
| PebBSYN9605    | <i>Prochlorococcus</i> sp. CC9605       | DOE-IMG       | Sync9605_0422    |
| PebBSYN9902    | <i>Prochlorococcus</i> sp. CC9902       | DOE-IMG       | Sync9902_1907    |
| PebBPROMM      | <i>Prochlorococcus marinus</i> MIT 9313 | DOE-IMG       | PMT1687          |

|               |                                          |                   |              |
|---------------|------------------------------------------|-------------------|--------------|
| PebBPROMA     | <i>Prochlorococcus marinus</i> CCMP 1375 | DOE-IMG           | Pro1748      |
| HY2ARATH      | <i>Arabidopsis thaliana</i>              | Genbank (genomic) | NP_566344    |
| HY2ORYSA      | <i>Oryza sativa</i>                      | Genbank (genomic) | BAD87875     |
| ELM1ZEAMA     | <i>Zea mays</i>                          | Genbank (genomic) | NP_001105256 |
| HY2LYCES      | <i>Solanum lycopersicum</i>              | Genbank (genomic) | BAD93478     |
| Acv_HY2       | <i>Adiantum capillus-veneris</i>         | Genbank (genomic) | BAF02518     |
| Pp_HY2        | <i>Physcomitrella patens</i>             | Genbank (genomic) | BAF02520     |
| Chaeto_HY2    | <i>Chaetosphaeridium globosum</i>        | Genbank (EST)     | HO384609     |
| kfl00177_0010 | <i>Klebsormidium flaccidum</i>           | Genbank (genomic) | GAQ84116     |
| AZZW-2019954  | <i>Chlorokybus atmophyticus</i>          | OneKP             | AZZW-2019954 |
| JPYU-2037290  | <i>Marchantia polymorpha</i>             | OneKP             | JPYU-2037290 |
| TCBC-2082726  | <i>Nothoceros vincentianus</i>           | OneKP             | TCBC-2082726 |
| FFPD-2057880  | <i>Ceratodon purpureus</i>               | OneKP             | FFPD-2057880 |
| XZUY-2012311  | <i>Cycas micholitzii</i>                 | OneKP             | XZUY-2012311 |
| BYQM-2011005  | <i>Posidonia australis</i>               | OneKP             | BYQM-2011005 |
| FFGR-2000050  | <i>Netrium digitus</i>                   | OneKP             | FFGR-2000050 |

|              |                                   |                      |              |
|--------------|-----------------------------------|----------------------|--------------|
| WDCW-2047152 | <i>Mesotaenium endlicherianum</i> | OneKP                | WDCW-2047152 |
| BFIK-2028189 | <i>Entransia fimbriata</i>        | OneKP                | BFIK-2028189 |
| FQLP-2031011 | <i>Klebsormidium subtile</i>      | OneKP                | FQLP-2031011 |
| RCCRARATH    | <i>Arabidopsis thaliana</i>       | Genbank<br>(genomic) | NP_195417    |
| DZTK-2041775 | <i>Batis maritima</i>             | OneKP                | DZTK-2041775 |
| HYZL-2141617 | <i>Akania lucens</i>              | OneKP                | HYZL-2141617 |

<sup>1</sup>Sequences found in individual MMETSP transcriptomes are designated by the data set (e.g. MMETSP1475) and the sequence identifier within that set (e.g. 3608\_1). Sequences found within the complete MMETSP assembly for a given organism are designated by ‘MMETSP transcriptome’ and the sequence identifier within that assembly (e.g. 23469\_1). Sequences found in the Genbank database of expressed sequence tags are designated by ‘Genbank (EST)’ and the accession code for that EST (e.g. HO384609). Sequences derived from genomic sequences and found within the Genbank protein database are designated by ‘Genbank (genomic)’ and the protein accession code (e.g. NP\_195417). Sequences found in the publicly available OneKP transcriptomes are designated by ‘OneKP’ and the sequence identifier for that transcript (e.g. XZUY-2049330). Sequences found in the DOE-IMG database are designated by ‘DOE-IMG’ and the locus tag for that sequence in the DOE-IMG database (e.g. Pro1748). The PCYA sequence for *Cyanophora paradoxa* CCMP 329 was inferred from a combination of genomic and EST data (Fig. S1a).
